# Supplementary material for: Circular inference in bistable perception
Source: PubMed Central journal article supplement (PMC7405786; doi:10.1167/jov.20.4.12), 2020-04-21
Supplement: jovi-20-4-12_s001.pdf [file jovi-20-4-12_s001.pdf]

## Figure S1.

Optimal values of free parameters in the three models [(A): NB, (B): WB, and (C): CI].

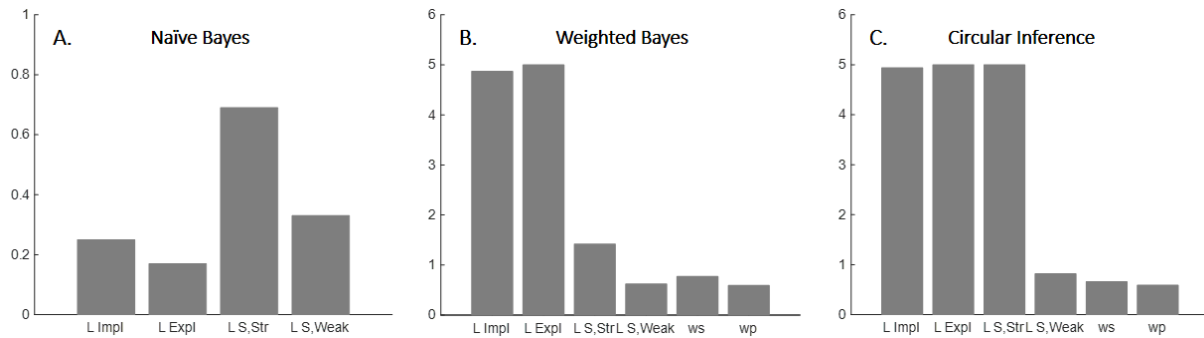

The parameters correspond to the curves presented in **Figure 5** (all the participants). The NB model had fewer free parameters than the other 2 models, since the two weights were by definition set to 1. We observed important differences in the values of the likelihoods ( $L_{S,Str}$  and  $L_{S,Weak}$ ) as well as in the values of the priors ( $L_{impl}$  and  $L_{expl}$ ) between the NB model, on one hand, and the WB and CI models, on the other hand. These differences were mainly due to different values of the weights ( $w_S$  and  $w_P$ ). In particular, the CI and WB models provide a more elaborate (but also more accurate) description of the inference problem. We must distinguish the interpretation of the weights, and the interpretations of  $L_{impl}$ ,  $L_{expl}$  and  $L_S$  as referring to completely different things. The weights express the trust given by the subject to each type of information, while the likelihoods express the level of reliability of this information.
