# Supplementary material for: Circular inference in bistable perception
Source: PubMed Central journal article supplement (PMC7405786; doi:10.1167/jov.20.4.12), 2020-04-21
Supplement: jovi-20-4-12_s006.pdf [file jovi-20-4-12_s006.pdf]

**Figure S6.**

Experimental results after excluding only the 7 outliers who also exhibited qualitatively strange behavior (flat psychometric curves or curves with negative slope or extreme values of RP in the weak-cue or ambiguous condition).

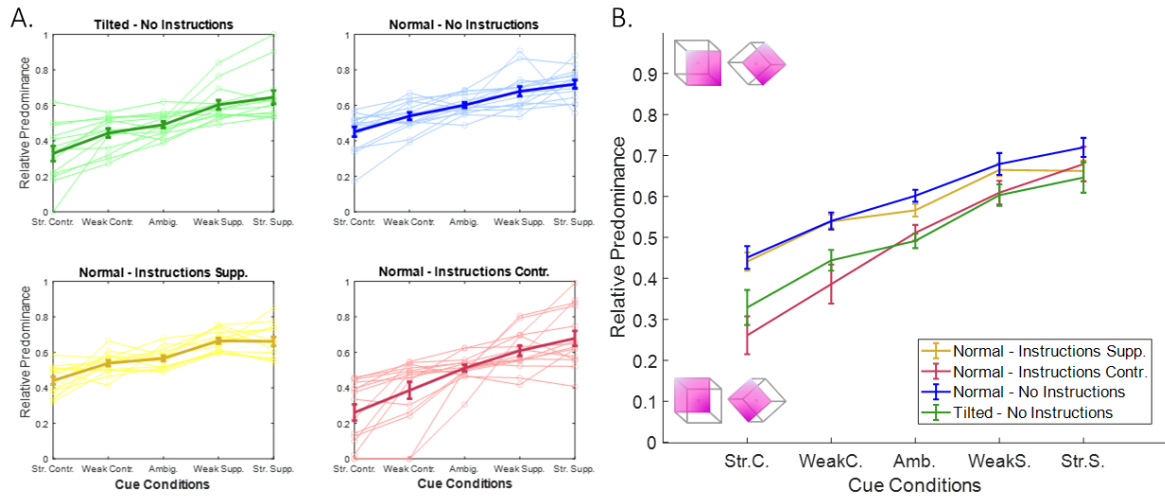

All the results presented in the **Main Text** remained unchanged (Interaction:  $p < 0.001$ ; BIC Scores: NB = -160.88; WB = -159.20; CI = -165.56  $\pm$  SE).
